# Supplementary material for: Amplified spontaneous emission from a liquid crystalline phase: anisotropic property and active modulation
Source: Royal Society of Chemistry journal article supplement (doi:10.1039/d3fd00122a), 2023-08-03
Supplement: d3fd00122a1.pdf [file d3fd00122a1.pdf]

*Electronic Supplementary Information for  
Amplified spontaneous emission from liquid crystalline phase:  
anisotropic property and active modulation*

Yusuke Tsutsui,<sup>\*a,b</sup> Tsuneaki Sakurai<sup>c</sup> and Shu Seki<sup>\*a</sup>

<sup>a</sup> Department of Molecular Engineering, Graduate School of Engineering, Kyoto University, Nishikyo-ku, Kyoto 615-8510, Japan

<sup>b</sup> JST-PRESTO, Honcho 4-1-8, Kawaguchi, Saitama 332-0012, Japan

<sup>c</sup> Faculty of Molecular Chemistry and Engineering, Kyoto Institute of Technology, Matsugasaki, Sakyo-ku, Kyoto 606-8585, Japan

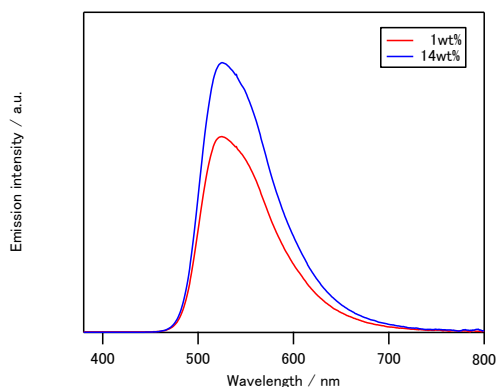

Fig. S1. Emission spectra of C4alkyne-HBT in 5CB with 1wt% (red) and 14wt% (blue) under 355 nm excitation with low power.

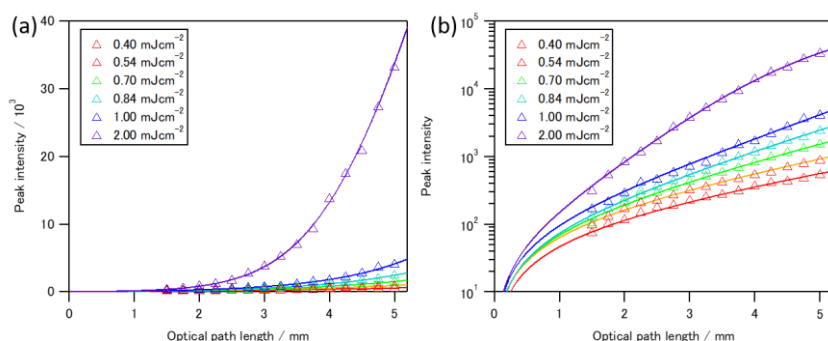

Fig. S2. Pump beam size dependence of the emission intensity from C4alkyne-HBT(14wt%)/5CB blend plotted in (a) linear and (b) semi-logarithmic scale. Pump energy was varied from 0.40 to 2.00 mJ cm<sup>-2</sup> and shown with fitted profiles.

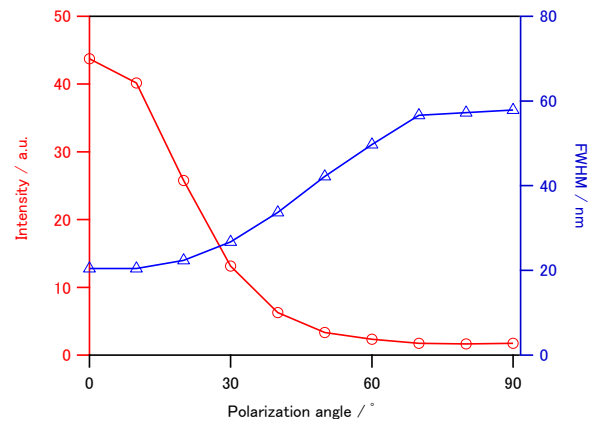

Fig. S3. Fluorescence intensity (red) and FWHM of the fluorescence spectra (blue) at perpendicular excitation ( $\theta = 90^\circ$ ) for 1wt% device under the pump fluence of  $1 \text{ mJ cm}^{-2}$ .
